# Supplementary material for: Composition of Sulla (Hedysarum coronarium L.) Honey Solvent Extractives Determined by GC/MS: Norisoprenoids and Other Volatile Organic Compounds
Source: PubMed Central journal article supplement (PMC6257696; doi:10.3390/molecules15096375), 2010-09-09
Supplement: molecules-15-06375-s001.pdf [file molecules-15-06375-s001.pdf]

Correction

**Correction: Jerković, I., et al. Composition of Sulla (*Hedysarum coronarium* L.) Honey Solvent Extractives Determined by GC/MS: Norisoprenoids and Other Volatile Organic Compounds. *Molecules* 2010, 15, 6375-6385**

Igor Jerković <sup>1,\*</sup>, Carlo I. G. Tuberoso <sup>2</sup>, Mirko Gugić <sup>3</sup> and Dragan Bubalo <sup>4</sup>

<sup>1</sup> Faculty of Chemistry and Technology, University of Split, N. Tesle 10/V, 21000 Split, Croatia

<sup>2</sup> Dipartimento di Tossicologia, Università di Cagliari, via Ospedale 72, 09124 Cagliari, Italy

<sup>3</sup> Marko Marulić Polytechnic in Knin, P. Krešimira IV 30, 22300 Knin, Croatia

<sup>4</sup> Faculty of Agriculture, University of Zagreb, Svetošimunska 25, 10000 Zagreb, Croatia

\* Author to whom correspondence should be addressed; E-Mail: igor@ktf-split.hr.

Received: 3 September 2013; in revised form: 21 October 2013 / Accepted: 30 October 2013 /  
Published: 30 October 2013

---

The authors wish to make the following correction to paper [1], doi:10.3390/molecules15096375, website: <http://www.mdpi.com/1420-3049/15/9/6375>.

The correct name of the second author is: Carlo I. G. Tuberoso.

## Reference

1. Jerković, I.; Tuberso, C.I.G.; Gugić, M.; Bubalo, D. Composition of sulla (*Hedysarum coronarium* L.) honey solvent extractives determined by GC/MS: Norisoprenoids and other volatile organic compounds. *Molecules* 2010, 15, 6375–6385.

© 2013 by the authors; licensee MDPI, Basel, Switzerland. This article is an open access article distributed under the terms and conditions of the Creative Commons Attribution license (<http://creativecommons.org/licenses/by/3.0/>).
